# Supplementary material
Source: HighWire-hosted journal article supplement (https://rmdopen.bmj.com/content/8/2/e002422)
Supplement: inline-supplementary-material-1 [file inline-supplementary-material-1.pdf]

|   | Inclusion criteria*                                                                        |
|---|--------------------------------------------------------------------------------------------|
| 1 | Diagnosis of AKU                                                                           |
| 2 | Any clinical manifestations of AKU, such as clinical ochronosis or chronic back/joint pain |
| 3 | Age $\geq$ 25 years                                                                        |
| 4 | Willing and able to visit the investigational site for study visits                        |
| 5 | Signed written informed consent given                                                      |

Supplementary Table 1. SONIA 2 inclusion criteria. \*A patient needed to fulfil the following criteria in order to be included in the study.
