# Supplementary material
Source: HighWire-hosted journal article supplement (https://rmdopen.bmj.com/content/8/2/e002422)
Supplement: inline-supplementary-material-2 [file inline-supplementary-material-2.pdf]

|    | Exclusion criteria*                                                                                             |
|----|-----------------------------------------------------------------------------------------------------------------|
| 1  | Treatment with nitisinone within 3 months of randomization                                                      |
| 2  | Participation in another clinical study within 3 months of randomization                                        |
| 3  | Known allergy to nitisinone or any of the constituents of the investigational product                           |
| 4  | Female patient of child-bearing potential not using a reliable method of contraception                          |
| 5  | Currently pregnant or lactating                                                                                 |
| 6  | Current malignancy                                                                                              |
| 7  | Uncontrolled hypertension (blood pressure greater than 180 mmHg systolic or greater than 95 mmHg diastolic)     |
| 8  | Unstable cardiovascular disease                                                                                 |
| 9  | Serum potassium < 3.0 mmol/L                                                                                    |
| 10 | eGFR < 60 mL/min/1.73 m <sup>2</sup>                                                                            |
| 11 | ALT > 3 x upper limit of normal                                                                                 |
| 12 | Haemoglobin < 10.0 g/dL                                                                                         |
| 13 | Platelets < 100 x 10 <sup>9</sup> /L                                                                            |
| 14 | Total white blood count < 3.0 x 10 <sup>9</sup> /L or neutrophil count < 1.5 x 10 <sup>9</sup> /L               |
| 15 | History of alcohol or drug abuse                                                                                |
| 16 | Psychiatric or somatic illness that interferes with compliance or communication with health care personnel      |
| 17 | Foreseeable inability to cooperate with given instructions or study procedures                                  |
| 18 | Any other medical condition which in the opinion of the investigator makes the patient unsuitable for inclusion |

Supplementary Table S2. SONIA 2 exclusion criteria. \*The presence of any of the following excluded a patient from inclusion in the study.
