# Supplementary material
Source: HighWire-hosted journal article supplement (https://rmdopen.bmj.com/content/8/2/e002422)
Supplement: inline-supplementary-material-5 [file inline-supplementary-material-5.pdf]

|                                         | Spinal stenosis  | Calcifications | Vacuum phenomena | Osteophytes or hyperostosis | Fusions  | Sum of all scores |
|-----------------------------------------|------------------|----------------|------------------|-----------------------------|----------|-------------------|
| <b>Age</b>                              | 0.78***          | 0.74***        | 0.46***          | 0.73***                     | 0.46***  | 0.78***           |
| <b>Height</b>                           | -0.33***         | -0.29***       | -0.31***         | -0.29***                    | -0.39*** | -0.38***          |
| <b>Weight</b>                           | 0.00             | -0.06          | -0.12            | -0.04                       | -0.18    | -0.08             |
| <b>Body mass index</b>                  | 0.21*            | 0.11           | 0.04             | 0.13                        | 0.02     | 0.13              |
| <b>sHGA</b>                             | 0.31***          | 0.27**         | 0.28***          | 0.18*                       | 0.28***  | 0.31***           |
| <b>uHGA<sub>24</sub></b>                | -0.17*           | -0.20*         | -0.09            | -0.23**                     | -0.11    | -0.20*            |
| <b>cAKUSSI</b>                          | 0.72***          | 0.73***        | 0.45***          | 0.68***                     | 0.42***  | 0.74***           |
| <b>mAKUSSI</b>                          | 0.68***          | 0.68***        | 0.41***          | 0.65***                     | 0.41***  | 0.70***           |
| <b>Eye ochronosis</b>                   | 0.57***          | 0.58***        | 0.38***          | 0.56***                     | 0.31***  | 0.60***           |
| <b>Ear ochronosis</b>                   | 0.47***          | 0.51***        | 0.27**           | 0.44***                     | 0.21**   | 0.48***           |
| <b>Prostate stones<sup>#</sup></b>      | 0.02             | 0.04           | 0.07             | 0.03                        | 0.03     | 0.05              |
| <b>Renal stones</b>                     | 0.08             | 0.09           | 0.02             | 0.12                        | -0.05    | 0.08              |
| <b>Bone mineral density, T score</b>    | 0.51***(0.22*)   | 0.51***(0.22*) | 0.40*** (0.26*)  | 0.43***                     | 0.31***  | 0.53***           |
| <b>Fractures</b>                        | 0.09             | 0.14           | -0.02            | 0.16                        | 0.03     | 0.11              |
| <b>Ruptures</b>                         | 0.24**           | 0.27**         | 0.08             | 0.26**                      | 0.15     | 0.25**            |
| <b>Aortic stenosis</b>                  | 0.30***          | 0.30**         | 0.14             | 0.31***                     | 0.39***  | 0.34***           |
| <b>Aortic sclerosis</b>                 | 0.28**           | 0.28**         | 0.18*            | 0.29**                      | 0.28**   | 0.31***           |
| <b>Hearing impairment</b>               | 0.20*            | 0.19*          | 0.16             | 0.14                        | 0.08     | 0.19*             |
| <b>Eardrum ochronosis</b>               | 0.10             | 0.09           | 0.14             | 0.03                        | 0.04     | 0.09              |
| <b>Joint pain</b>                       | 0.38***          | 0.39***        | 0.20*            | 0.33***                     | 0.16*    | 0.37***           |
| <b>Non-spine osteoarticular disease</b> | 0.28** (0.230**) | 0.27** (0.24*) | 0.25** (0.29**)  | 0.20*                       | 0.22**   | 0.30*** (0.33**)  |
| <b>Arthroscopies</b>                    | 0.14             | 0.16           | 0.10             | 0.16 (0.22*)                | 0.01     | 0.15 (0.20*)      |

|                                            |                   |                   |                  |                   |                 |                   |
|--------------------------------------------|-------------------|-------------------|------------------|-------------------|-----------------|-------------------|
| <b>Joint replacements</b>                  | 0.33***           | 0.33***           | 0.16             | 0.29**            | 0.31*** (0.22*) | 0.34*** (0.29**)  |
| <b>Spine pain</b>                          | 0.28**            | 0.24**            | 0.18*            | 0.25**            | 0.18*           | 0.28**            |
| <b>Osteoarticular disease in the spine</b> | 0.75*** (0.56***) | 0.70*** (0.48***) | 0.50*** (0.30**) | 0.70*** (0.49***) | 0.42***(0.20*)  | 0.76*** (0.60***) |
| <b>Kyphosis</b>                            | -0.23**           | -0.22*            | -0.18*           | -0.20*            | -0.04           | -0.22**           |
| <b>Scoliosis</b>                           | 0.19*             | 0.18*             | 0.14             | 0.24**            | 0.10            | 0.21*             |

Supplementary Table S4. Pearson's r coefficients for correlations between sum of radiographic scores in the spine (cervical + thoracic + lumbosacral) and baseline patient characteristics including cAKUSI components of 138 AKU patients except #92 male AKU patients for prostate stones. Serum concentration of homogentisic acid (sHGA). Urinary concentration of homogentisic acid (uHGA<sub>24</sub>). Clinical alkaptonuria severity score index (cAKUSI). \*p<0.05. \*\*p<0.01. \*\*\*p<0.001. Numbers in brackets show age-adjusted partial correlation coefficient r, non-significant partial correlations not shown.
