# Supplementary material
Source: HighWire-hosted journal article supplement (https://rmdopen.bmj.com/content/8/2/e002422)
Supplement: inline-supplementary-material-6 [file inline-supplementary-material-6.pdf]

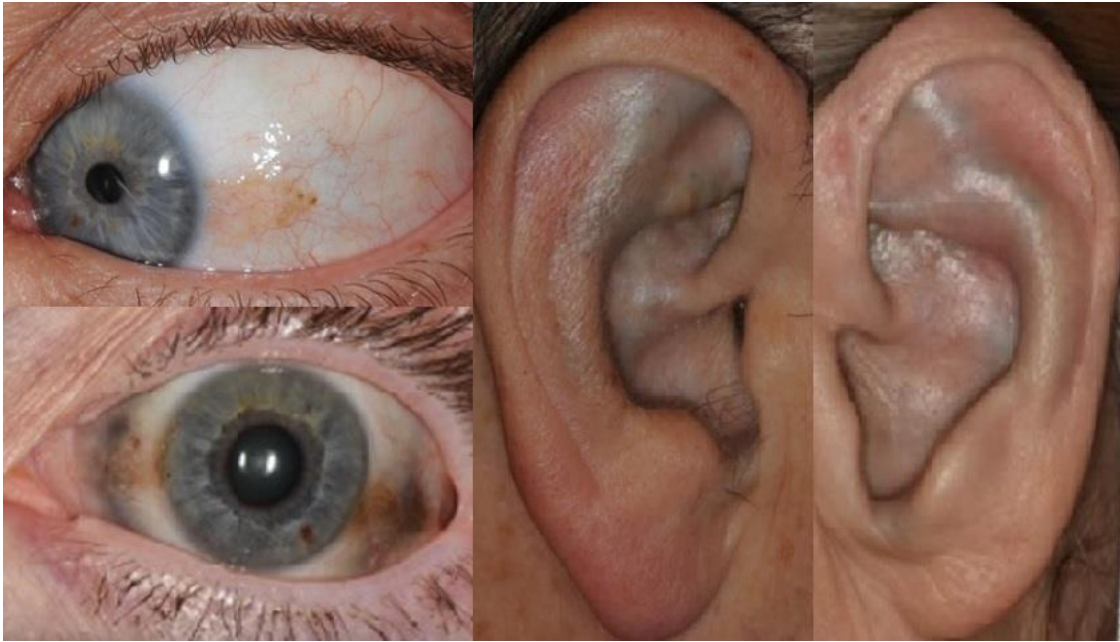

Supplementary Figure S1. Examples of eye and ear ochronosis in AKU patients. Conjunctival pigmentation in male in his 30s (top, left), ear ochronosis in man in his 60s (centre), ear ochronosis in woman in her 60s (right) and scleral ochronotic pigmentation in woman in her 60s (bottom, left).
